# Supplementary material for: UPLC-G2Si-HDMS Untargeted Metabolomics for Identification of Yunnan Baiyao’s Metabolic Target in Promoting Blood Circulation and Removing Blood Stasis
Source: MDPI journal article supplement (doi:10.3390/molecules27103208), 2022-05-17
Supplement: s1 [file s1]

# UPLC-G2Si-HDMS Untargeted Metabolomics for Identification of Yunnan

## Baiyao's Metabolic Target in Promoting Blood Circulation and Removing Blood Stasis

Table S1. Secondary ion fragmentation information matching results.

### 1. Sumiki's acid:

Input:

|                                                                                    |           |                                              |
|------------------------------------------------------------------------------------|-----------|----------------------------------------------|
| 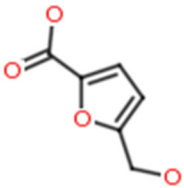 | ID (job)  | 4                                            |
|                                                                                    | Mass (Da) | 142.0266                                     |
|                                                                                    | Formula   | C <sub>6</sub> H <sub>6</sub> O <sub>4</sub> |
|                                                                                    | DBE       | 4                                            |

Experiment:

|                          |                                                                                                             |
|--------------------------|-------------------------------------------------------------------------------------------------------------|
| Product ion(s) (Da)      | 123.0335 105.9658 80.9571<br>+/- 0.1 in positive mode, structure filter off                                 |
| DBE                      | 0 to 50                                                                                                     |
| Electron count           | both                                                                                                        |
| Maximum H deficit        | 6                                                                                                           |
| Fragment number of bonds | 4                                                                                                           |
| Scoring                  | aromatic: 6, multiple: 4, ring: 2, phenyl: 8, other: 1<br>H-deficit: 0, hetero modifier: 0.5, max score: 16 |
| Order:                   | mass                                                                                                        |
| Plot:                    | show <input checked="" type="checkbox"/> hide <input type="checkbox"/>                                      |

Results:

|          |         |          |         |         |         |
|----------|---------|----------|---------|---------|---------|
| 123.0335 | ↗ (-2H) | 105.9658 | ↗ (-2H) | 80.9571 | ↗ (+1H) |
|----------|---------|----------|---------|---------|---------|

|                                                                                                                                                                                          |                                                                                                                                                                                                      |                                                                                                                                                                                             |
|------------------------------------------------------------------------------------------------------------------------------------------------------------------------------------------|------------------------------------------------------------------------------------------------------------------------------------------------------------------------------------------------------|---------------------------------------------------------------------------------------------------------------------------------------------------------------------------------------------|
| 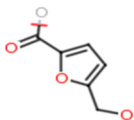 <p>123.0082 (+25.3.mDa) (S:0.5, B:1)<br/>C<sub>6</sub>H<sub>3</sub>O<sub>3</sub> (-H<sub>4</sub>O)</p> |  <p>106.0055 (-39.7.mDa) (S:1.0, B:2)<br/>C<sub>6</sub>H<sub>2</sub>O<sub>2</sub> (-H<sub>5</sub>O<sub>2</sub>)</p> |  <p>81.0340 (-76.9.mDa) (S:10.5, B:2)<br/>C<sub>5</sub>H<sub>5</sub>O (-CH<sub>2</sub>O<sub>3</sub>)</p> |
|------------------------------------------------------------------------------------------------------------------------------------------------------------------------------------------|------------------------------------------------------------------------------------------------------------------------------------------------------------------------------------------------------|---------------------------------------------------------------------------------------------------------------------------------------------------------------------------------------------|

## 2. Imidaz-ole-4-acetaldehyde:

Input:

|                                                                                    |           |                                                |
|------------------------------------------------------------------------------------|-----------|------------------------------------------------|
| 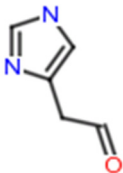 | ID (job)  | 10                                             |
|                                                                                    | Mass (Da) | 110.0480                                       |
|                                                                                    | Formula   | C <sub>5</sub> H <sub>6</sub> N <sub>2</sub> O |
|                                                                                    | DBE       | 4                                              |

Experiment:

|                          |                                                                                                             |
|--------------------------|-------------------------------------------------------------------------------------------------------------|
| Product ion(s) (Da)      | 93.0945 79.9555<br>+/- 0.1 in positive mode, structure filter off                                           |
| DBE                      | 0 to 50                                                                                                     |
| Electron count           | both                                                                                                        |
| Maximum H deficit        | 6                                                                                                           |
| Fragment number of bonds | 4                                                                                                           |
| Scoring                  | aromatic: 6, multiple: 4, ring: 2, phenyl: 8, other: 1<br>H-deficit: 0, hetero modifier: 0.5, max score: 16 |
| Order:                   | mass                                                                                                        |
| Plot:                    | show <input checked="" type="checkbox"/> hide <input type="checkbox"/>                                      |

Results:

|         |          |         |          |
|---------|----------|---------|----------|
| 93.0945 | ↗+ (-1H) | 79.9555 | ↗+ (-1H) |
|---------|----------|---------|----------|

|                                                                                                                                                                                         |                                                                                                                                                                                           |
|-----------------------------------------------------------------------------------------------------------------------------------------------------------------------------------------|-------------------------------------------------------------------------------------------------------------------------------------------------------------------------------------------|
| 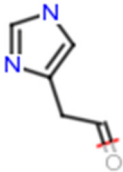 <p>93.0453 (+49.2.mDa) (S:2.0, B:1)<br/>C<sub>5</sub>H<sub>5</sub>N<sub>2</sub> (-H<sub>2</sub>O)</p> |  <p>80.0374 (-81.9.mDa) (S:1.0, B:1)<br/>C<sub>4</sub>H<sub>4</sub>N<sub>2</sub> (-CH<sub>3</sub>O)</p> |
|-----------------------------------------------------------------------------------------------------------------------------------------------------------------------------------------|-------------------------------------------------------------------------------------------------------------------------------------------------------------------------------------------|

### 3. Gam-ma-delta-Dioxoval eric acid:

Input:

|                                                                                     |           |                                              |
|-------------------------------------------------------------------------------------|-----------|----------------------------------------------|
| 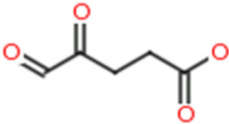 | ID (job)  | 65                                           |
|                                                                                     | Mass (Da) | 130.0266                                     |
|                                                                                     | Formula   | C <sub>5</sub> H <sub>6</sub> O <sub>4</sub> |
|                                                                                     | DBE       | 3                                            |

Experiment:

|                          |                                                                                                             |
|--------------------------|-------------------------------------------------------------------------------------------------------------|
| Product ion(s) (Da)      | 115.9131 85.0256 99.9185<br>+/- 0.1 in positive mode, structure filter off                                  |
| DBE                      | 0 to 50                                                                                                     |
| Electron count           | both                                                                                                        |
| Maximum H deficit        | 6                                                                                                           |
| Fragment number of bonds | 4                                                                                                           |
| Scoring                  | aromatic: 6, multiple: 4, ring: 2, phenyl: 8, other: 1<br>H-deficit: 0, hetero modifier: 0.5, max score: 16 |
| Order:                   | mass                                                                                                        |
| Plot:                    | show <input checked="" type="checkbox"/> hide <input type="checkbox"/>                                      |

Results:

|         |         |         |         |
|---------|---------|---------|---------|
| 99.9185 | ↔ (-1H) | 85.0256 | ↔ (+1H) |
|---------|---------|---------|---------|

|                                                                                                                                                                                           |                                                                                                                                                                                                      |
|-------------------------------------------------------------------------------------------------------------------------------------------------------------------------------------------|------------------------------------------------------------------------------------------------------------------------------------------------------------------------------------------------------|
| 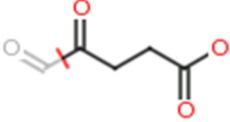 <p>100.0160 (-97.5.mDa) (S:1.0, B:1)<br/>C<sub>4</sub>H<sub>4</sub>O<sub>3</sub> (-CH<sub>3</sub>O)</p> |  <p>85.0290 (-3.4.mDa) (S:1.5, B:2)<br/>C<sub>4</sub>H<sub>5</sub>O<sub>2</sub> (-CH<sub>2</sub>O<sub>2</sub>)</p> |
|-------------------------------------------------------------------------------------------------------------------------------------------------------------------------------------------|------------------------------------------------------------------------------------------------------------------------------------------------------------------------------------------------------|

#### 4. Glutaconic acid:

Input:

|                                                                                     |                  |                                              |
|-------------------------------------------------------------------------------------|------------------|----------------------------------------------|
| 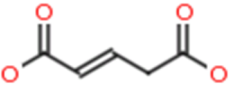 | <b>ID (job)</b>  | 40                                           |
|                                                                                     | <b>Mass (Da)</b> | 130.0266                                     |
|                                                                                     | <b>Formula</b>   | C <sub>5</sub> H <sub>6</sub> O <sub>4</sub> |
|                                                                                     | <b>DBE</b>       | 3                                            |

Experiment:

|                                 |                                                                                                             |
|---------------------------------|-------------------------------------------------------------------------------------------------------------|
| <b>Product ion(s) (Da)</b>      | 111.0621 83.0652<br>+/- 0.1 in positive mode, structure filter off                                          |
| <b>DBE</b>                      | 0 to 50                                                                                                     |
| <b>Electron count</b>           | both                                                                                                        |
| <b>Maximum H deficit</b>        | 6                                                                                                           |
| <b>Fragment number of bonds</b> | 4                                                                                                           |
| <b>Scoring</b>                  | aromatic: 6, multiple: 4, ring: 2, phenyl: 8, other: 1<br>H-deficit: 0, hetero modifier: 0.5, max score: 16 |
| <b>Order:</b>                   | mass                                                                                                        |
| <b>Plot:</b>                    | show <input checked="" type="checkbox"/> hide <input type="checkbox"/>                                      |

Results:

|                                                                                                                                                                                                                                      |                                                                                                                                                                                                                                                   |
|--------------------------------------------------------------------------------------------------------------------------------------------------------------------------------------------------------------------------------------|---------------------------------------------------------------------------------------------------------------------------------------------------------------------------------------------------------------------------------------------------|
| <b>111.0621</b> $\neg + (-2H)$<br><br>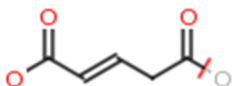<br><br>111.0082 (+53.9.mDa) (S:0.5, B:1)<br>C <sub>5</sub> H <sub>3</sub> O <sub>3</sub> (-H <sub>4</sub> O) | <b>83.0652</b> $\neg + (-2H)$<br><br><br><br>83.0133 (+51.9.mDa) (S:1.0, B:1)<br>C <sub>4</sub> H <sub>3</sub> O <sub>2</sub> (-CH <sub>4</sub> O <sub>2</sub> ) |
|--------------------------------------------------------------------------------------------------------------------------------------------------------------------------------------------------------------------------------------|---------------------------------------------------------------------------------------------------------------------------------------------------------------------------------------------------------------------------------------------------|

## 5. Oxoadipic acid:

Input:

|                                                                                     |                  |                                              |
|-------------------------------------------------------------------------------------|------------------|----------------------------------------------|
| 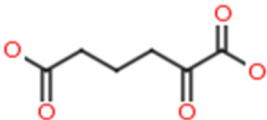 | <b>ID (job)</b>  | 86                                           |
|                                                                                     | <b>Mass (Da)</b> | 160.0372                                     |
|                                                                                     | <b>Formula</b>   | C <sub>6</sub> H <sub>8</sub> O <sub>5</sub> |
|                                                                                     | <b>DBE</b>       | 3                                            |

Experiment:

|                                 |                                                                                                             |
|---------------------------------|-------------------------------------------------------------------------------------------------------------|
| <b>Product ion(s) (Da)</b>      | 115.0353 121.9970 136.0336 98.0222<br>+/- 0.1 in positive mode, structure filter off                        |
| <b>DBE</b>                      | 0 to 50                                                                                                     |
| <b>Electron count</b>           | both                                                                                                        |
| <b>Maximum H deficit</b>        | 6                                                                                                           |
| <b>Fragment number of bonds</b> | 4                                                                                                           |
| <b>Scoring</b>                  | aromatic: 6, multiple: 4, ring: 2, phenyl: 8, other: 1<br>H-deficit: 0, hetero modifier: 0.5, max score: 16 |
| <b>Order:</b>                   | mass                                                                                                        |
| <b>Plot:</b>                    | show <input checked="" type="checkbox"/> hide <input type="checkbox"/>                                      |

Results:

|                                                                                                                                                                                                           |                                                                                                                                                                                                           |
|-----------------------------------------------------------------------------------------------------------------------------------------------------------------------------------------------------------|-----------------------------------------------------------------------------------------------------------------------------------------------------------------------------------------------------------|
| <b>115.0353</b> $\neg + (+0H)$<br>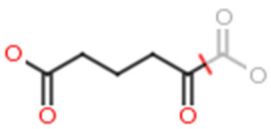<br>115.0395 (-4.2.mDa) (S:1.0, B:1)<br>$C_5H_7O_3$ (-CH <sub>2</sub> O <sub>2</sub> ) | <b>98.0222</b> $\neg + (+0H)$<br><br>98.0368 (-14.6.mDa) (S:1.5, B:2)<br>$C_5H_6O_2$ (-CH <sub>3</sub> O <sub>3</sub> ) |
|-----------------------------------------------------------------------------------------------------------------------------------------------------------------------------------------------------------|-----------------------------------------------------------------------------------------------------------------------------------------------------------------------------------------------------------|

## 6. L-2-Hydroxyglutaric acid:

Input:

|                                                                                     |                  |             |
|-------------------------------------------------------------------------------------|------------------|-------------|
| 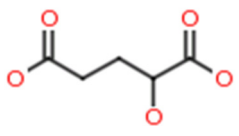 | <b>ID (job)</b>  | 78          |
|                                                                                     | <b>Mass (Da)</b> | 148.0372    |
|                                                                                     | <b>Formula</b>   | $C_5H_8O_5$ |
|                                                                                     | <b>DBE</b>       | 2           |

Experiment:

|                                 |                                                                                                             |
|---------------------------------|-------------------------------------------------------------------------------------------------------------|
| <b>Product ion(s) (Da)</b>      | 103.0378 123.0407 85.0239 87.0050<br>+/- 0.1 in positive mode, structure filter off                         |
| <b>DBE</b>                      | 0 to 50                                                                                                     |
| <b>Electron count</b>           | both                                                                                                        |
| <b>Maximum H deficit</b>        | 6                                                                                                           |
| <b>Fragment number of bonds</b> | 4                                                                                                           |
| <b>Scoring</b>                  | aromatic: 6, multiple: 4, ring: 2, phenyl: 8, other: 1<br>H-deficit: 0, hetero modifier: 0.5, max score: 16 |
| <b>Order:</b>                   | mass                                                                                                        |
| <b>Plot:</b>                    | show <input checked="" type="checkbox"/> hide <input type="checkbox"/>                                      |

Results:

|                                                                                                                                                                                                                                                    |                                                                                                                                                                                                                                                   |                                                                                                                                                                                                                                                 |
|----------------------------------------------------------------------------------------------------------------------------------------------------------------------------------------------------------------------------------------------------|---------------------------------------------------------------------------------------------------------------------------------------------------------------------------------------------------------------------------------------------------|-------------------------------------------------------------------------------------------------------------------------------------------------------------------------------------------------------------------------------------------------|
| <b>103.0378</b> $\rightarrow$ (+0H)<br>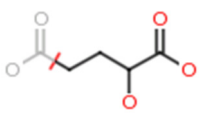<br>103.0395 (-1.7.mDa)<br>(S:1.0, B:1)<br>C <sub>4</sub> H <sub>7</sub> O <sub>3</sub> (-CH <sub>2</sub> O <sub>2</sub> ) | <b>87.0050</b> $\rightarrow$ (+1H)<br><br>87.0446 (-39.6.mDa)<br>(S:1.5, B:2)<br>C <sub>4</sub> H <sub>7</sub> O <sub>2</sub> (-CH <sub>2</sub> O <sub>3</sub> ) | <b>85.0239</b> $\rightarrow$ (-1H)<br><br>85.0290 (-5.1.mDa) (S:1.5, B:2)<br>C <sub>4</sub> H <sub>5</sub> O <sub>2</sub> (-CH <sub>4</sub> O <sub>3</sub> ) |
|----------------------------------------------------------------------------------------------------------------------------------------------------------------------------------------------------------------------------------------------------|---------------------------------------------------------------------------------------------------------------------------------------------------------------------------------------------------------------------------------------------------|-------------------------------------------------------------------------------------------------------------------------------------------------------------------------------------------------------------------------------------------------|

## 7. DHAP (8:0):

Input:

|                                                                                     |                  |                                                  |
|-------------------------------------------------------------------------------------|------------------|--------------------------------------------------|
| 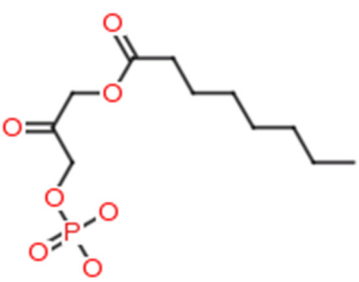 | <b>ID (job)</b>  | 6                                                |
|                                                                                     | <b>Mass (Da)</b> | 296.1025                                         |
|                                                                                     | <b>Formula</b>   | C <sub>11</sub> H <sub>21</sub> O <sub>7</sub> P |
|                                                                                     | <b>DBE</b>       | 3                                                |

Experiment:

|                                 |                                                                                                             |
|---------------------------------|-------------------------------------------------------------------------------------------------------------|
| <b>Product ion(s) (Da)</b>      | 159.0454 175.0756 253.0503 295.1271<br>+/- 0.1 in negative mode, structure filter off                       |
| <b>DBE</b>                      | 0 to 50                                                                                                     |
| <b>Electron count</b>           | both                                                                                                        |
| <b>Maximum H deficit</b>        | 6                                                                                                           |
| <b>Fragment number of bonds</b> | 4                                                                                                           |
| <b>Scoring</b>                  | aromatic: 6, multiple: 4, ring: 2, phenyl: 8, other: 1<br>H-deficit: 0, hetero modifier: 0.5, max score: 16 |
| <b>Order:</b>                   | mass                                                                                                        |
| <b>Plot:</b>                    | show <input checked="" type="checkbox"/> hide <input type="checkbox"/>                                      |

Results:

|                                                                                                                                                                                                                                               |                                                                                                                                                                                                                                                              |                                                                                                                                                                                                                                                                |
|-----------------------------------------------------------------------------------------------------------------------------------------------------------------------------------------------------------------------------------------------|--------------------------------------------------------------------------------------------------------------------------------------------------------------------------------------------------------------------------------------------------------------|----------------------------------------------------------------------------------------------------------------------------------------------------------------------------------------------------------------------------------------------------------------|
| <b>253.0503</b> $\neg$ (+2H)<br>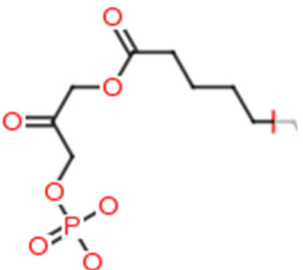<br>253.0477 (+2.6.mDa)<br>(S:1.0, B:1)<br>C <sub>8</sub> H <sub>14</sub> O <sub>7</sub> P (-C <sub>3</sub> H <sub>6</sub> ) | <b>175.0756</b> $\neg$ (+5H)<br><br>175.0970 (-21.4.mDa)<br>(S:2.0, B:2)<br>C <sub>8</sub> H <sub>15</sub> O <sub>4</sub> (-C <sub>3</sub> H <sub>5</sub> O <sub>3</sub> P) | <b>159.0454</b> $\neg$ (+3H)<br><br>159.0657 (-20.3.mDa)<br>(S:2.0, B:2)<br>C <sub>7</sub> H <sub>11</sub> O <sub>4</sub> (-C <sub>4</sub> H <sub>9</sub> O <sub>3</sub> P) |
|-----------------------------------------------------------------------------------------------------------------------------------------------------------------------------------------------------------------------------------------------|--------------------------------------------------------------------------------------------------------------------------------------------------------------------------------------------------------------------------------------------------------------|----------------------------------------------------------------------------------------------------------------------------------------------------------------------------------------------------------------------------------------------------------------|

## 8. Vinylacetylglycine:

Input:

|                                                                                     |                  |                                               |
|-------------------------------------------------------------------------------------|------------------|-----------------------------------------------|
| 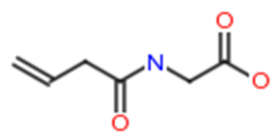 | <b>ID (job)</b>  | 37                                            |
|                                                                                     | <b>Mass (Da)</b> | 143.0582                                      |
|                                                                                     | <b>Formula</b>   | C <sub>6</sub> H <sub>9</sub> NO <sub>3</sub> |
|                                                                                     | <b>DBE</b>       | 3                                             |

Experiment:

|                                 |                                                                                                             |
|---------------------------------|-------------------------------------------------------------------------------------------------------------|
| <b>Product ion(s) (Da)</b>      | 124.0346 143.0363 83.0675 98.0528<br>+/- 0.1 in positive mode, structure filter off                         |
| <b>DBE</b>                      | 0 to 50                                                                                                     |
| <b>Electron count</b>           | both                                                                                                        |
| <b>Maximum H deficit</b>        | 6                                                                                                           |
| <b>Fragment number of bonds</b> | 4                                                                                                           |
| <b>Scoring</b>                  | aromatic: 6, multiple: 4, ring: 2, phenyl: 8, other: 1<br>H-deficit: 0, hetero modifier: 0.5, max score: 16 |
| <b>Order:</b>                   | mass                                                                                                        |
| <b>Plot:</b>                    | show <input checked="" type="checkbox"/> hide <input type="checkbox"/>                                      |

Results:

|                              |                             |                             |
|------------------------------|-----------------------------|-----------------------------|
| <b>124.0346</b> $\neg$ (+2H) | <b>98.0528</b> $\neg$ (+0H) | <b>83.0675</b> $\neg$ (+1H) |
|------------------------------|-----------------------------|-----------------------------|



|                                                                                                                                                                                          |                                                                                                                                                                                          |                                                                                                                                                                                                         |
|------------------------------------------------------------------------------------------------------------------------------------------------------------------------------------------|------------------------------------------------------------------------------------------------------------------------------------------------------------------------------------------|---------------------------------------------------------------------------------------------------------------------------------------------------------------------------------------------------------|
| 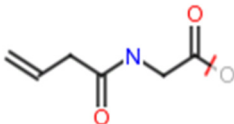 <p>124.0399 (-5.3.mDa) (S:0.5, B:1)<br/>C<sub>6</sub>H<sub>6</sub>NO<sub>2</sub> (-H<sub>4</sub>O)</p> |  <p>98.0606 (-7.8.mDa) (S:1.0, B:1)<br/>C<sub>5</sub>H<sub>8</sub>NO (-CH<sub>2</sub>O<sub>2</sub>)</p> |  <p>83.0371 (+30.4.mDa) (S:0.5, B:1)<br/>C<sub>4</sub>H<sub>5</sub>NO (-C<sub>2</sub>H<sub>5</sub>O<sub>2</sub>)</p> |
|                                                                                                                                                                                          |                                                                                                                                                                                          |                                                                                                                                                                                                         |

## 9. Allysine:

Input:

|                                                                                     |        |           |                                                |
|-------------------------------------------------------------------------------------|--------|-----------|------------------------------------------------|
| 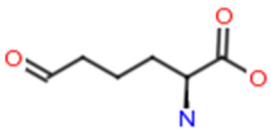 | Chiral | ID (job)  | 55                                             |
|                                                                                     |        | Mass (Da) | 145.0739                                       |
|                                                                                     |        | Formula   | C <sub>6</sub> H <sub>11</sub> NO <sub>3</sub> |
|                                                                                     |        | DBE       | 2                                              |

Experiment:

|                          |                                                                                                             |
|--------------------------|-------------------------------------------------------------------------------------------------------------|
| Product ion(s) (Da)      | 85.0265 87.0020<br>+/- 0.1 in positive mode, structure filter off                                           |
| DBE                      | 0 to 50                                                                                                     |
| Electron count           | both                                                                                                        |
| Maximum H deficit        | 6                                                                                                           |
| Fragment number of bonds | 4                                                                                                           |
| Scoring                  | aromatic: 6, multiple: 4, ring: 2, phenyl: 8, other: 1<br>H-deficit: 0, hetero modifier: 0.5, max score: 16 |
| Order:                   | mass                                                                                                        |
| Plot:                    | show <input checked="" type="checkbox"/> hide <input type="checkbox"/>                                      |

Results:

|         |         |         |         |
|---------|---------|---------|---------|
| 87.0020 | ↗ (+1H) | 85.0265 | ↘ (-1H) |
|---------|---------|---------|---------|

| Chiral                                                                                                               | Chiral                                                                                                              |
|----------------------------------------------------------------------------------------------------------------------|---------------------------------------------------------------------------------------------------------------------|
| 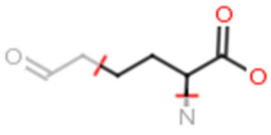                                    |                                   |
| 87.0446 (-42.6.mDa) (S:1.5, B:2)<br>C <sub>4</sub> H <sub>7</sub> O <sub>2</sub> (-C <sub>2</sub> H <sub>5</sub> NO) | 85.0290 (-2.5.mDa) (S:1.5, B:2)<br>C <sub>4</sub> H <sub>5</sub> O <sub>2</sub> (-C <sub>2</sub> H <sub>7</sub> NO) |

## 10. Thymidine:

Input:

|                                                                                     |        |           |                                                               |
|-------------------------------------------------------------------------------------|--------|-----------|---------------------------------------------------------------|
| 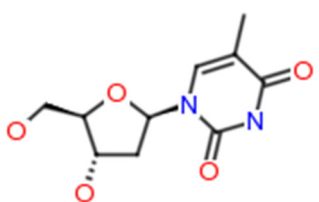 | Chiral | ID (job)  | 71                                                            |
|                                                                                     |        | Mass (Da) | 242.0903                                                      |
|                                                                                     |        | Formula   | C <sub>10</sub> H <sub>14</sub> N <sub>2</sub> O <sub>5</sub> |
|                                                                                     |        | DBE       | 6                                                             |

Experiment:

|                          |                                                                                                             |
|--------------------------|-------------------------------------------------------------------------------------------------------------|
| Product ion(s) (Da)      | 108.0213 121.0293 131.0824 203.0009 242.0780<br>+/- 0.1 in negative mode, structure filter off              |
| DBE                      | 0 to 50                                                                                                     |
| Electron count           | both                                                                                                        |
| Maximum H deficit        | 6                                                                                                           |
| Fragment number of bonds | 4                                                                                                           |
| Scoring                  | aromatic: 6, multiple: 4, ring: 2, phenyl: 8, other: 1<br>H-deficit: 0, hetero modifier: 0.5, max score: 16 |
| Order:                   | mass                                                                                                        |
| Plot:                    | show <input checked="" type="checkbox"/> hide <input type="checkbox"/>                                      |

Results:

|                                                                                                                                                                                                                             |                                                                                                                                                                                                                              |                                                                                                                                                                                                                                    |
|-----------------------------------------------------------------------------------------------------------------------------------------------------------------------------------------------------------------------------|------------------------------------------------------------------------------------------------------------------------------------------------------------------------------------------------------------------------------|------------------------------------------------------------------------------------------------------------------------------------------------------------------------------------------------------------------------------------|
| <b>203.000</b> $\neg$ -<br><b>9</b> (+3H)<br>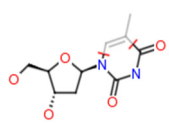<br>Chiral<br><br>203.0668 (-<br>65.9.mDa) (S:3.0,<br>B:2)<br>$C_7H_{11}N_2O_5$ (- $C_3H_2$ ) | <b>131.082</b> $\neg$ -<br><b>4</b> (+5H)<br><br>Chiral<br><br>131.0582<br>(+24.2.mDa) (S:3.0,<br>B:3)<br>$C_5H_9NO_3$ (-<br>$C_5H_4NO_2$ ) | <b>108.021</b> $\neg$ - (-<br><b>3</b> 1H)<br><br>Chiral<br><br>108.0086<br>(+12.7.mDa) (S:3.5,<br>B:4)<br>$C_5H_2NO_2$ (-<br>$C_5H_{11}NO_3$ ) |
|                                                                                                                                                                                                                             |                                                                                                                                                                                                                              |                                                                                                                                                                                                                                    |

## 11. Gentisate aldehyde:

Input:

|                                                                                     |           |             |
|-------------------------------------------------------------------------------------|-----------|-------------|
| 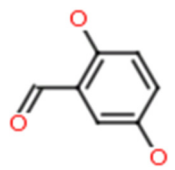 | ID (job)  | 11          |
|                                                                                     | Mass (Da) | 138.0317    |
|                                                                                     | Formula   | $C_7H_6O_3$ |
|                                                                                     | DBE       | 5           |

Experiment:

|                          |                                                                                                             |
|--------------------------|-------------------------------------------------------------------------------------------------------------|
| Product ion(s) (Da)      | 121.0161 109.0313<br>+/- 0.1 in positive mode, structure filter off                                         |
| DBE                      | 0 to 50                                                                                                     |
| Electron count           | both                                                                                                        |
| Maximum H deficit        | 6                                                                                                           |
| Fragment number of bonds | 4                                                                                                           |
| Scoring                  | aromatic: 6, multiple: 4, ring: 2, phenyl: 8, other: 1<br>H-deficit: 0, hetero modifier: 0.5, max score: 16 |
| Order:                   | mass                                                                                                        |
| Plot:                    | show <input checked="" type="checkbox"/> hide <input type="checkbox"/>                                      |

Results:

|                                                                                                                                                                                 |                                                                                                                                                                                   |
|---------------------------------------------------------------------------------------------------------------------------------------------------------------------------------|-----------------------------------------------------------------------------------------------------------------------------------------------------------------------------------|
| <b>121.0161</b> $\neg + (-1H)$<br>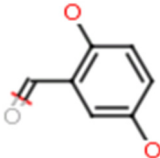<br>121.0290 (-12.9.mDa) (S:2.0, B:1)<br>$C_7H_5O_2 (-H_2O)$ | <b>109.0313</b> $\neg + (+0H)$<br><br>109.0290 (+2.3.mDa) (S:10.0, B:1)<br>$C_6H_5O_2 (-CH_2O)$ |
|---------------------------------------------------------------------------------------------------------------------------------------------------------------------------------|-----------------------------------------------------------------------------------------------------------------------------------------------------------------------------------|

## 12. 2-Octenedioic acid:

Input:

|                                                                                     |                  |                |
|-------------------------------------------------------------------------------------|------------------|----------------|
| 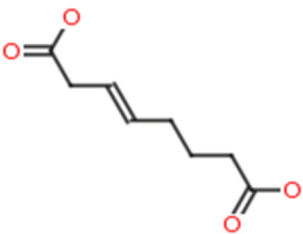 | <b>ID (job)</b>  | 96             |
|                                                                                     | <b>Mass (Da)</b> | 172.0736       |
|                                                                                     | <b>Formula</b>   | $C_8H_{12}O_4$ |
|                                                                                     | <b>DBE</b>       | 4              |

Experiment:

|                                 |                                                                                                             |
|---------------------------------|-------------------------------------------------------------------------------------------------------------|
| <b>Product ion(s) (Da)</b>      | 111.0816 129.0916 171.0653 86.9758<br>+/- 0.1 in negative mode, structure filter off                        |
| <b>DBE</b>                      | 0 to 50                                                                                                     |
| <b>Electron count</b>           | both                                                                                                        |
| <b>Maximum H deficit</b>        | 6                                                                                                           |
| <b>Fragment number of bonds</b> | 4                                                                                                           |
| <b>Scoring</b>                  | aromatic: 6, multiple: 4, ring: 2, phenyl: 8, other: 1<br>H-deficit: 0, hetero modifier: 0.5, max score: 16 |
| <b>Order:</b>                   | mass                                                                                                        |
| <b>Plot:</b>                    | show <input checked="" type="checkbox"/> hide <input type="checkbox"/>                                      |

Results:

|                                                                                                                                                                                                                                 |                                                                                                                                                                                                                                                              |                                                                                                                                                                                                                                                           |
|---------------------------------------------------------------------------------------------------------------------------------------------------------------------------------------------------------------------------------|--------------------------------------------------------------------------------------------------------------------------------------------------------------------------------------------------------------------------------------------------------------|-----------------------------------------------------------------------------------------------------------------------------------------------------------------------------------------------------------------------------------------------------------|
| <b>129.0916</b> $\neg$ - (+4H)<br>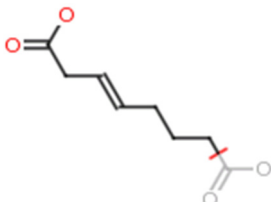<br>129.0916 (+0.0.mDa)<br>(S:1.0, B:1)<br>C <sub>7</sub> H <sub>13</sub> O <sub>2</sub> (-CO <sub>2</sub> ) | <b>111.0816</b> $\neg$ - (+0H)<br><br>111.0446 (+37.0.mDa)<br>(S:1.0, B:1)<br>C <sub>6</sub> H <sub>7</sub> O <sub>2</sub> (-C <sub>2</sub> H <sub>4</sub> O <sub>2</sub> ) | <b>86.9758</b> $\neg$ - (+4H)<br><br>87.0446 (-68.8.mDa) (S:1.0, B:1)<br>C <sub>4</sub> H <sub>7</sub> O <sub>2</sub> (-C <sub>4</sub> H <sub>4</sub> O <sub>2</sub> ) |
|---------------------------------------------------------------------------------------------------------------------------------------------------------------------------------------------------------------------------------|--------------------------------------------------------------------------------------------------------------------------------------------------------------------------------------------------------------------------------------------------------------|-----------------------------------------------------------------------------------------------------------------------------------------------------------------------------------------------------------------------------------------------------------|

### 13. Enkephalin L:

Input:

|                                                                                    |                  |                                                               |
|------------------------------------------------------------------------------------|------------------|---------------------------------------------------------------|
| 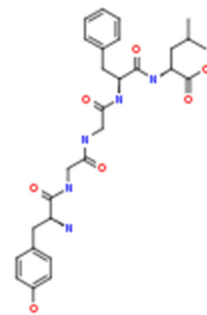 | <b>ID (job)</b>  | 85                                                            |
|                                                                                    | <b>Mass (Da)</b> | 555.2693                                                      |
|                                                                                    | <b>Formula</b>   | C <sub>28</sub> H <sub>37</sub> N <sub>5</sub> O <sub>7</sub> |
|                                                                                    | <b>DBE</b>       | 14                                                            |

Experiment:

|                                 |                                                                                                             |
|---------------------------------|-------------------------------------------------------------------------------------------------------------|
| <b>Product ion(s) (Da)</b>      | 130.0867 169.0723 236.1032 554.2607<br>+/- 0.1 in negative mode, structure filter off                       |
| <b>DBE</b>                      | 0 to 50                                                                                                     |
| <b>Electron count</b>           | both                                                                                                        |
| <b>Maximum H deficit</b>        | 6                                                                                                           |
| <b>Fragment number of bonds</b> | 4                                                                                                           |
| <b>Scoring</b>                  | aromatic: 6, multiple: 4, ring: 2, phenyl: 8, other: 1<br>H-deficit: 0, hetero modifier: 0.5, max score: 16 |
| <b>Order:</b>                   | mass                                                                                                        |
| <b>Plot:</b>                    | show <input checked="" type="checkbox"/> hide <input type="checkbox"/>                                      |

Results:

|                                |                                |                                |
|--------------------------------|--------------------------------|--------------------------------|
| <b>236.1032</b> $\neg$ - (-2H) | <b>169.0723</b> $\neg$ - (+1H) | <b>130.0867</b> $\neg$ - (+4H) |
|--------------------------------|--------------------------------|--------------------------------|

|                                                                                                                                                                                                                                                         |                                                                                                                                                                                                                                                        |                                                                                                                                                                                                                                                     |
|---------------------------------------------------------------------------------------------------------------------------------------------------------------------------------------------------------------------------------------------------------|--------------------------------------------------------------------------------------------------------------------------------------------------------------------------------------------------------------------------------------------------------|-----------------------------------------------------------------------------------------------------------------------------------------------------------------------------------------------------------------------------------------------------|
| 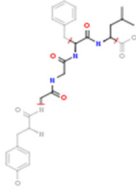 <p>236.1035 (-0.3.mDa)<br/>(S:2.5, B:3)<br/>C<sub>11</sub>H<sub>14</sub>N<sub>3</sub>O<sub>3</sub> (-<br/>C<sub>17</sub>H<sub>22</sub>N<sub>2</sub>O<sub>4</sub>)</p> |  <p>169.0487 (+23.6.mDa)<br/>(S:2.0, B:3)<br/>C<sub>6</sub>H<sub>7</sub>N<sub>3</sub>O<sub>3</sub> (-<br/>C<sub>22</sub>H<sub>29</sub>N<sub>2</sub>O<sub>4</sub>)</p> |  <p>130.0617 (+25.0.mDa)<br/>(S:2.0, B:3)<br/>C<sub>4</sub>H<sub>8</sub>N<sub>3</sub>O<sub>2</sub> (-C<sub>24</sub>H<sub>28</sub>N<sub>2</sub>O<sub>5</sub>)</p> |
|---------------------------------------------------------------------------------------------------------------------------------------------------------------------------------------------------------------------------------------------------------|--------------------------------------------------------------------------------------------------------------------------------------------------------------------------------------------------------------------------------------------------------|-----------------------------------------------------------------------------------------------------------------------------------------------------------------------------------------------------------------------------------------------------|

#### 14. Normetanephine:

Input:

|                                                                                    |           |                                                |
|------------------------------------------------------------------------------------|-----------|------------------------------------------------|
| 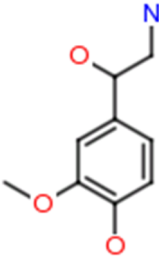 | ID (job)  | 44                                             |
|                                                                                    | Mass (Da) | 183.0895                                       |
|                                                                                    | Formula   | C <sub>9</sub> H <sub>13</sub> NO <sub>3</sub> |
|                                                                                    | DBE       | 4                                              |

Experiment:

|                          |                                                                                                             |
|--------------------------|-------------------------------------------------------------------------------------------------------------|
| Product ion(s) (Da)      | 166.1053 150.1259 137.9975 131.0403<br>+/- 0.1 in positive mode, structure filter off                       |
| DBE                      | 0 to 50                                                                                                     |
| Electron count           | both                                                                                                        |
| Maximum H deficit        | 6                                                                                                           |
| Fragment number of bonds | 4                                                                                                           |
| Scoring                  | aromatic: 6, multiple: 4, ring: 2, phenyl: 8, other: 1<br>H-deficit: 0, hetero modifier: 0.5, max score: 16 |
| Order:                   | mass                                                                                                        |
| Plot:                    | show <input checked="" type="checkbox"/> hide <input checked="" type="checkbox"/>                           |

Results:

|                                                                                                                                                                                                                                     |                                                                                                                                                                                                                                      |                                                                                                                                                                                                                                    |                                                                                                                                                                                                                                         |
|-------------------------------------------------------------------------------------------------------------------------------------------------------------------------------------------------------------------------------------|--------------------------------------------------------------------------------------------------------------------------------------------------------------------------------------------------------------------------------------|------------------------------------------------------------------------------------------------------------------------------------------------------------------------------------------------------------------------------------|-----------------------------------------------------------------------------------------------------------------------------------------------------------------------------------------------------------------------------------------|
| <b>166.1053</b><br>$\neg + (-1H)$<br>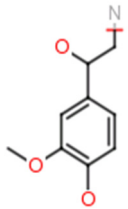<br>166.0630 (+42.3.mDa)<br>(S:0.5, B:1)<br>C <sub>9</sub> H <sub>10</sub> O <sub>3</sub> (-H <sub>4</sub> N) | <b>150.1259</b><br>$\neg + (+0H)$<br><br>150.0681 (+57.8.mDa)<br>(S:1.0, B:2)<br>C <sub>9</sub> H <sub>10</sub> O <sub>2</sub> (-H <sub>4</sub> NO) | <b>137.9975</b><br>$\neg + (+3H)$<br><br>138.0681 (-70.6.mDa) (S:1.5, B:3)<br>C <sub>8</sub> H <sub>10</sub> O <sub>2</sub> (-CH <sub>4</sub> NO) | <b>131.0403</b><br>$\neg + (-4H)$<br><br>131.0133 (+27.0.mDa)<br>(S:1.5, B:3)<br>C <sub>8</sub> H <sub>3</sub> O <sub>2</sub> (-CH <sub>11</sub> NO) |
|                                                                                                                                                                                                                                     |                                                                                                                                                                                                                                      |                                                                                                                                                                                                                                    |                                                                                                                                                                                                                                         |

### 15. 2-Methyl-3-ketovaleric acid:

Input:

|                                                                                     |                  |                                               |
|-------------------------------------------------------------------------------------|------------------|-----------------------------------------------|
| 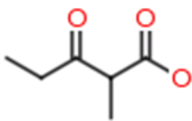 | <b>ID (job)</b>  | 42                                            |
|                                                                                     | <b>Mass (Da)</b> | 130.0630                                      |
|                                                                                     | <b>Formula</b>   | C <sub>6</sub> H <sub>10</sub> O <sub>3</sub> |
|                                                                                     | <b>DBE</b>       | 2                                             |

Experiment:

|                                 |                                                                                                             |
|---------------------------------|-------------------------------------------------------------------------------------------------------------|
| <b>Product ion(s) (Da)</b>      | 96.9583 79.9693<br>+/- 0.1 in positive mode, structure filter off                                           |
| <b>DBE</b>                      | 0 to 50                                                                                                     |
| <b>Electron count</b>           | both                                                                                                        |
| <b>Maximum H deficit</b>        | 6                                                                                                           |
| <b>Fragment number of bonds</b> | 4                                                                                                           |
| <b>Scoring</b>                  | aromatic: 6, multiple: 4, ring: 2, phenyl: 8, other: 1<br>H-deficit: 0, hetero modifier: 0.5, max score: 16 |
| <b>Order:</b>                   | mass                                                                                                        |
| <b>Plot:</b>                    | show <input checked="" type="checkbox"/> hide <input type="checkbox"/>                                      |

Results:

|                                                                                                       |                |                                                                                                       |                |
|-------------------------------------------------------------------------------------------------------|----------------|-------------------------------------------------------------------------------------------------------|----------------|
| 96.9583                                                                                               | $\neg + (-1H)$ | 79.9693                                                                                               | $\neg + (-3H)$ |
| 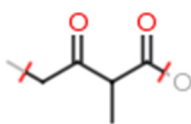                     |                |                      |                |
| 97.0290 (-70.7.mDa) (S:1.5, B:2)<br>C <sub>5</sub> H <sub>5</sub> O <sub>2</sub> (-CH <sub>6</sub> O) |                | 79.9898 (-20.5.mDa) (S:2.5, B:3)<br>C <sub>4</sub> O <sub>2</sub> (-C <sub>2</sub> H <sub>11</sub> O) |                |

## 16. Enol-phenylpyruvate:

Input:

|                                                                                     |           |                                              |
|-------------------------------------------------------------------------------------|-----------|----------------------------------------------|
| 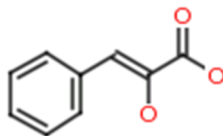 | ID (job)  | 38                                           |
|                                                                                     | Mass (Da) | 164.0473                                     |
|                                                                                     | Formula   | C <sub>9</sub> H <sub>8</sub> O <sub>3</sub> |
|                                                                                     | DBE       | 6                                            |

Experiment:

|                          |                                                                                                             |
|--------------------------|-------------------------------------------------------------------------------------------------------------|
| Product ion(s) (Da)      | 164.9961 147.0202 119.0432 92.1066<br>+/- 0.1 in positive mode, structure filter off                        |
| DBE                      | 0 to 50                                                                                                     |
| Electron count           | both                                                                                                        |
| Maximum H deficit        | 6                                                                                                           |
| Fragment number of bonds | 4                                                                                                           |
| Scoring                  | aromatic: 6, multiple: 4, ring: 2, phenyl: 8, other: 1<br>H-deficit: 0, hetero modifier: 0.5, max score: 16 |
| Order:                   | mass                                                                                                        |
| Plot:                    | show <input checked="" type="checkbox"/> hide <input type="checkbox"/>                                      |

Results:



|                                                                                                                                                                                                                                   |                                                                                                                                                                                                                                    |                                                                                                                                                                                                                                       |
|-----------------------------------------------------------------------------------------------------------------------------------------------------------------------------------------------------------------------------------|------------------------------------------------------------------------------------------------------------------------------------------------------------------------------------------------------------------------------------|---------------------------------------------------------------------------------------------------------------------------------------------------------------------------------------------------------------------------------------|
| <b>147.0202</b> $\rightarrow$ (+0H)<br>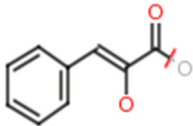<br>147.0446 (-24.4.mDa) (S:0.5, B:1)<br>C <sub>9</sub> H <sub>7</sub> O <sub>2</sub> (-H <sub>2</sub> O) | <b>119.0432</b> $\rightarrow$ (+0H)<br><br>119.0497 (-6.5.mDa) (S:1.0, B:1)<br>C <sub>8</sub> H <sub>7</sub> O (-CH <sub>2</sub> O <sub>2</sub> ) | <b>92.106</b> $\rightarrow$ (+2H)<br>6<br><br>92.0626 (+44.0.mDa) (S:4.0, B:1)<br>C <sub>7</sub> H <sub>8</sub> (-C <sub>2</sub> HO <sub>3</sub> ) |
|                                                                                                                                                                                                                                   |                                                                                                                                                                                                                                    |                                                                                                                                                                                                                                       |

### 17. (4-hydroxyphenyl)acetaldehyde:

Input:

|                                                                                     |                  |                                              |
|-------------------------------------------------------------------------------------|------------------|----------------------------------------------|
| 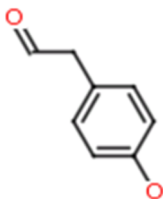 | <b>ID (job)</b>  | 41                                           |
|                                                                                     | <b>Mass (Da)</b> | 136.0524                                     |
|                                                                                     | <b>Formula</b>   | C <sub>8</sub> H <sub>8</sub> O <sub>2</sub> |
|                                                                                     | <b>DBE</b>       | 5                                            |

Experiment:

|                                 |                                                                                                             |
|---------------------------------|-------------------------------------------------------------------------------------------------------------|
| <b>Product ion(s) (Da)</b>      | 136.0288 108.0139 93.0328<br>+/- 0.1 in positive mode, structure filter off                                 |
| <b>DBE</b>                      | 0 to 50                                                                                                     |
| <b>Electron count</b>           | both                                                                                                        |
| <b>Maximum H deficit</b>        | 6                                                                                                           |
| <b>Fragment number of bonds</b> | 4                                                                                                           |
| <b>Scoring</b>                  | aromatic: 6, multiple: 4, ring: 2, phenyl: 8, other: 1<br>H-deficit: 0, hetero modifier: 0.5, max score: 16 |
| <b>Order:</b>                   | mass                                                                                                        |
| <b>Plot:</b>                    | show <input checked="" type="checkbox"/> hide <input checked="" type="checkbox"/>                           |

Results:

|                                                                                                                                                                                  |                                                                                                                                                                                  |                                                                                                                                                                                                              |
|----------------------------------------------------------------------------------------------------------------------------------------------------------------------------------|----------------------------------------------------------------------------------------------------------------------------------------------------------------------------------|--------------------------------------------------------------------------------------------------------------------------------------------------------------------------------------------------------------|
| <b>136.0288</b> $\neg + (+0H)$<br>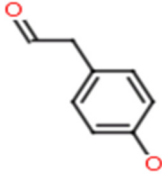<br><br>136.0524 (-23.6.mDa) (S:8.0, B:0)<br>$C_8H_8O_2$ (-H) | <b>108.0139</b> $\neg + (+1H)$<br><br><br>108.0575 (-43.6.mDa) (S:1.0, B:1)<br>$C_7H_8O$ (-CHO) | <b>93.0328</b> $\neg + (+0H)$<br><br><br>93.0340 (-1.2.mDa) (S:10.0, B:1)<br>$C_6H_5O$ (-C <sub>2</sub> H <sub>4</sub> O) |
|                                                                                                                                                                                  |                                                                                                                                                                                  |                                                                                                                                                                                                              |

## 18. Pimelic acid:

Input:

|                                                                                     |                  |                |
|-------------------------------------------------------------------------------------|------------------|----------------|
|  | <b>ID (job)</b>  | 12             |
|                                                                                     | <b>Mass (Da)</b> | 160.0736       |
|                                                                                     | <b>Formula</b>   | $C_7H_{12}O_4$ |
|                                                                                     | <b>DBE</b>       | 2              |

Experiment:

|                                 |                                                                                                             |
|---------------------------------|-------------------------------------------------------------------------------------------------------------|
| <b>Product ion(s) (Da)</b>      | 144.0050 125.0203 96.0089<br>+/- 0.1 in positive mode, structure filter off                                 |
| <b>DBE</b>                      | 0 to 50                                                                                                     |
| <b>Electron count</b>           | both                                                                                                        |
| <b>Maximum H deficit</b>        | 6                                                                                                           |
| <b>Fragment number of bonds</b> | 4                                                                                                           |
| <b>Scoring</b>                  | aromatic: 6, multiple: 4, ring: 2, phenyl: 8, other: 1<br>H-deficit: 0, hetero modifier: 0.5, max score: 16 |
| <b>Order:</b>                   | mass                                                                                                        |
| <b>Plot:</b>                    | show <input checked="" type="checkbox"/> hide <input type="checkbox"/>                                      |

Results:

|                                                                                                                                                                                                                   |                                                                                                                                                                                                                                              |                                                                                                                                                                                                                                  |
|-------------------------------------------------------------------------------------------------------------------------------------------------------------------------------------------------------------------|----------------------------------------------------------------------------------------------------------------------------------------------------------------------------------------------------------------------------------------------|----------------------------------------------------------------------------------------------------------------------------------------------------------------------------------------------------------------------------------|
| <b>144.0050</b> $\neg+$ (+1H)<br><br>144.0786 (-73.6.mDa)<br>(S:0.5, B:1)<br>C <sub>7</sub> H <sub>12</sub> O <sub>3</sub> (-HO) | <b>125.0203</b> $\neg+$ (-1H)<br><br>125.0603 (-40.0.mDa)<br>(S:1.0, B:2)<br>C <sub>7</sub> H <sub>9</sub> O <sub>2</sub> (-H <sub>4</sub> O <sub>2</sub> ) | <b>96.0089</b> $\neg+$ (-2H)<br><br>96.0575 (-48.6.mDa)<br>(S:1.5, B:2)<br>C <sub>6</sub> H <sub>8</sub> O (-CH <sub>5</sub> O <sub>3</sub> ) |
|-------------------------------------------------------------------------------------------------------------------------------------------------------------------------------------------------------------------|----------------------------------------------------------------------------------------------------------------------------------------------------------------------------------------------------------------------------------------------|----------------------------------------------------------------------------------------------------------------------------------------------------------------------------------------------------------------------------------|

### 19. (+) - (1R,2R)-1,2-Diphenylethane-1,2-diol:

Input:

|                                                                                    |        |           |                                                |
|------------------------------------------------------------------------------------|--------|-----------|------------------------------------------------|
| 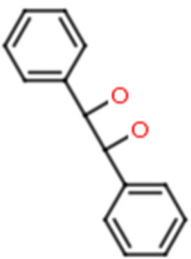 | Chiral | ID (job)  | 7                                              |
|                                                                                    |        | Mass (Da) | 214.0994                                       |
|                                                                                    |        | Formula   | C <sub>14</sub> H <sub>14</sub> O <sub>2</sub> |
|                                                                                    |        | DBE       | 8                                              |

Experiment:

|                          |                                                                                                             |
|--------------------------|-------------------------------------------------------------------------------------------------------------|
| Product ion(s) (Da)      | 135.0413 137.0956 181.0764<br>+/- 0.1 in positive mode, structure filter off                                |
| DBE                      | 0 to 50                                                                                                     |
| Electron count           | both                                                                                                        |
| Maximum H deficit        | 6                                                                                                           |
| Fragment number of bonds | 4                                                                                                           |
| Scoring                  | aromatic: 6, multiple: 4, ring: 2, phenyl: 8, other: 1<br>H-deficit: 0, hetero modifier: 0.5, max score: 16 |
| Order:                   | mass                                                                                                        |
| Plot:                    | show <input checked="" type="checkbox"/> hide <input type="checkbox"/>                                      |

Results:

|                               |                               |
|-------------------------------|-------------------------------|
| <b>137.0956</b> $\neg+$ (+0H) | <b>135.0413</b> $\neg+$ (-2H) |
|-------------------------------|-------------------------------|

|                                                                                                                                                                                                       |                                                                                                                                                                                                                     |
|-------------------------------------------------------------------------------------------------------------------------------------------------------------------------------------------------------|---------------------------------------------------------------------------------------------------------------------------------------------------------------------------------------------------------------------|
| 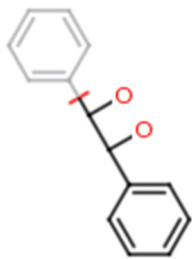 <p>137.0603 (+35.3.mDa) (S:10.0, B:1)<br/>C<sub>8</sub>H<sub>9</sub>O<sub>2</sub> (-C<sub>6</sub>H<sub>6</sub>)</p> | <p>Chiral</p>  <p>135.0446 (-3.3.mDa) (S:10.0, B:1)<br/>C<sub>8</sub>H<sub>7</sub>O<sub>2</sub> (-C<sub>6</sub>H<sub>6</sub>)</p> |
|-------------------------------------------------------------------------------------------------------------------------------------------------------------------------------------------------------|---------------------------------------------------------------------------------------------------------------------------------------------------------------------------------------------------------------------|

## 20. 5-L-Glutamyl-aurine:

Input:

|                                                                                                  |           |                                                                |
|--------------------------------------------------------------------------------------------------|-----------|----------------------------------------------------------------|
| 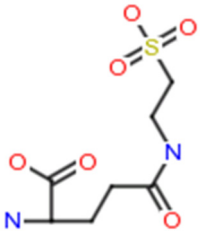 <p>Chiral</p> | ID (job)  | 12                                                             |
|                                                                                                  | Mass (Da) | 254.0573                                                       |
|                                                                                                  | Formula   | C <sub>7</sub> H <sub>14</sub> N <sub>2</sub> O <sub>6</sub> S |
|                                                                                                  | DBE       | 3                                                              |

Experiment:

|                          |                                                                                                             |
|--------------------------|-------------------------------------------------------------------------------------------------------------|
| Product ion(s) (Da)      | 143.0500 165.1283 209.0609 253.0504<br>+/- 0.1 in negative mode, structure filter off                       |
| DBE                      | 0 to 50                                                                                                     |
| Electron count           | both                                                                                                        |
| Maximum H deficit        | 6                                                                                                           |
| Fragment number of bonds | 4                                                                                                           |
| Scoring                  | aromatic: 6, multiple: 4, ring: 2, phenyl: 8, other: 1<br>H-deficit: 0, hetero modifier: 0.5, max score: 16 |
| Order:                   | mass                                                                                                        |
| Plot:                    | show <input checked="" type="checkbox"/> hide <input type="checkbox"/>                                      |

Results:

|          |         |          |         |          |         |
|----------|---------|----------|---------|----------|---------|
| 209.0609 | ↖ (+2H) | 165.1283 | ↖ (+4H) | 143.0500 | ↖ (-2H) |
|----------|---------|----------|---------|----------|---------|

|                                                                                                                                                                                                            |                                                                                                                                                                                                                           |                                                                                                                                                                                                                            |
|------------------------------------------------------------------------------------------------------------------------------------------------------------------------------------------------------------|---------------------------------------------------------------------------------------------------------------------------------------------------------------------------------------------------------------------------|----------------------------------------------------------------------------------------------------------------------------------------------------------------------------------------------------------------------------|
| 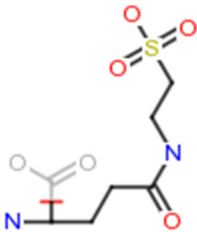 <p>209.0596 (+1.3.mDa)<br/>(S:1.0, B:1)<br/>C<sub>6</sub>H<sub>13</sub>N<sub>2</sub>O<sub>4</sub>S (-CO<sub>2</sub>)</p> |  <p>165.0460 (+82.3.mDa)<br/>(S:2.0, B:2)<br/>C<sub>5</sub>H<sub>11</sub>NO<sub>3</sub>S (-C<sub>2</sub>H<sub>2</sub>NO<sub>3</sub>)</p> |  <p>143.0041 (+45.9.mDa)<br/>(S:4.0, B:3)<br/>C<sub>5</sub>H<sub>5</sub>NO<sub>2</sub>S (-C<sub>2</sub>H<sub>8</sub>NO<sub>4</sub>)</p> |
|------------------------------------------------------------------------------------------------------------------------------------------------------------------------------------------------------------|---------------------------------------------------------------------------------------------------------------------------------------------------------------------------------------------------------------------------|----------------------------------------------------------------------------------------------------------------------------------------------------------------------------------------------------------------------------|

## 21. Thymi-dine5'-triphosphate:

Input:

|                                                                                    |        |           |                                                                               |
|------------------------------------------------------------------------------------|--------|-----------|-------------------------------------------------------------------------------|
| 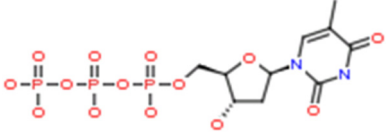 | Chiral | ID (job)  | 76                                                                            |
|                                                                                    |        | Mass (Da) | 481.9893                                                                      |
|                                                                                    |        | Formula   | C <sub>10</sub> H <sub>17</sub> N <sub>2</sub> O <sub>14</sub> P <sub>3</sub> |
|                                                                                    |        | DBE       | 6                                                                             |

Experiment:

|                          |                                                                                                             |
|--------------------------|-------------------------------------------------------------------------------------------------------------|
| Product ion(s) (Da)      | 162.0537 212.0024 242.0126 480.9731<br>+/- 0.1 in negative mode, structure filter off                       |
| DBE                      | 0 to 50                                                                                                     |
| Electron count           | both                                                                                                        |
| Maximum H deficit        | 6                                                                                                           |
| Fragment number of bonds | 4                                                                                                           |
| Scoring                  | aromatic: 6, multiple: 4, ring: 2, phenyl: 8, other: 1<br>H-deficit: 0, hetero modifier: 0.5, max score: 16 |
| Order:                   | mass                                                                                                        |
| Plot:                    | show <input checked="" type="checkbox"/> hide <input type="checkbox"/>                                      |

Results:

|          |          |          |          |          |          |
|----------|----------|----------|----------|----------|----------|
| 242.0126 | ↖- (+3H) | 212.0024 | ↖- (+4H) | 162.0537 | ↖- (-2H) |
|----------|----------|----------|----------|----------|----------|

|                                                                                                               |                                                                                                              |                                                                                                                          |
|---------------------------------------------------------------------------------------------------------------|--------------------------------------------------------------------------------------------------------------|--------------------------------------------------------------------------------------------------------------------------|
| Chiral                                                                                                        | Chiral                                                                                                       | Chiral                                                                                                                   |
| 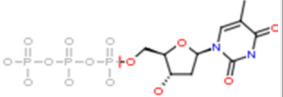                             |                            |                                       |
| 242.0903 (-77.7.mDa)<br>(S:1.0, B:1)<br>$C_{10}H_{14}N_2O_5$ (-H <sub>2</sub> O <sub>9</sub> P <sub>3</sub> ) | 212.0797 (-77.3.mDa)<br>(S:1.5, B:2)<br>$C_9H_{12}N_2O_4$ (-CH <sub>4</sub> O <sub>10</sub> P <sub>3</sub> ) | 162.0065 (+47.2.mDa)<br>(S:5.5, B:4)<br>$C_7H_2N_2O_3$ (-C <sub>3</sub> H <sub>14</sub> O <sub>11</sub> P <sub>3</sub> ) |

## 22. D-Leucine:

Input:

|                                                                                     |        |           |                 |
|-------------------------------------------------------------------------------------|--------|-----------|-----------------|
| 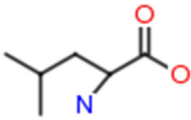 | Chiral | ID (job)  | 13              |
|                                                                                     |        | Mass (Da) | 131.0946        |
|                                                                                     |        | Formula   | $C_6H_{13}NO_2$ |
|                                                                                     |        | DBE       | 1               |

Experiment:

|                          |                                                                                                             |
|--------------------------|-------------------------------------------------------------------------------------------------------------|
| Product ion(s) (Da)      | 89.0084 72.9893<br>+/- 0.1 in positive mode, structure filter off                                           |
| DBE                      | 0 to 50                                                                                                     |
| Electron count           | both                                                                                                        |
| Maximum H deficit        | 6                                                                                                           |
| Fragment number of bonds | 4                                                                                                           |
| Scoring                  | aromatic: 6, multiple: 4, ring: 2, phenyl: 8, other: 1<br>H-deficit: 0, hetero modifier: 0.5, max score: 16 |
| Order:                   | mass                                                                                                        |
| Plot:                    | show <input checked="" type="checkbox"/> hide <input type="checkbox"/>                                      |

Results:

|                                                                                                                                                                                                                                                       |                                                                                                                                                                                                                                            |
|-------------------------------------------------------------------------------------------------------------------------------------------------------------------------------------------------------------------------------------------------------|--------------------------------------------------------------------------------------------------------------------------------------------------------------------------------------------------------------------------------------------|
| <b>89.0084</b><br>$\neg+$ (+1H)<br>Chiral<br>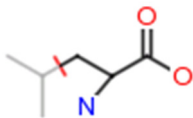<br>89.0477 (-39.3.mDa) (S:1.0, B:1)<br>C <sub>3</sub> H <sub>7</sub> NO <sub>2</sub> (-C <sub>3</sub> H <sub>7</sub> ) | <b>72.9893</b><br>$\neg+$ (+2H)<br>Chiral<br><br>73.0528 (-63.5.mDa) (S:1.5, B:2)<br>C <sub>3</sub> H <sub>7</sub> NO (-C <sub>3</sub> H <sub>7</sub> O) |
|-------------------------------------------------------------------------------------------------------------------------------------------------------------------------------------------------------------------------------------------------------|--------------------------------------------------------------------------------------------------------------------------------------------------------------------------------------------------------------------------------------------|

### 23. 3-Oxodecanoic acid:

Input:

|                                                                                     |                  |                                                |
|-------------------------------------------------------------------------------------|------------------|------------------------------------------------|
| 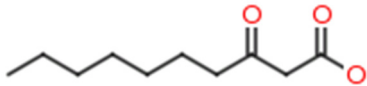 | <b>ID (job)</b>  | 75                                             |
|                                                                                     | <b>Mass (Da)</b> | 186.1256                                       |
|                                                                                     | <b>Formula</b>   | C <sub>10</sub> H <sub>18</sub> O <sub>3</sub> |
|                                                                                     | <b>DBE</b>       | 3                                              |

Experiment:

|                                 |                                                                                                             |
|---------------------------------|-------------------------------------------------------------------------------------------------------------|
| <b>Product ion(s) (Da)</b>      | 109.0276 125.1014 141.0911 185.1135 79.9580<br>+/- 0.1 in negative mode, structure filter off               |
| <b>DBE</b>                      | 0 to 50                                                                                                     |
| <b>Electron count</b>           | both                                                                                                        |
| <b>Maximum H deficit</b>        | 6                                                                                                           |
| <b>Fragment number of bonds</b> | 4                                                                                                           |
| <b>Scoring</b>                  | aromatic: 6, multiple: 4, ring: 2, phenyl: 8, other: 1<br>H-deficit: 0, hetero modifier: 0.5, max score: 16 |
| <b>Order:</b>                   | mass                                                                                                        |
| <b>Plot:</b>                    | show <input checked="" type="checkbox"/> hide <input type="checkbox"/>                                      |

Results:

|                                                                                                                                                                                                                                                   |                                                                                                                                                                                                                                                    |                                                                                                                                                                                                                                                     |                                                                                                                                                                                                                                                      |
|---------------------------------------------------------------------------------------------------------------------------------------------------------------------------------------------------------------------------------------------------|----------------------------------------------------------------------------------------------------------------------------------------------------------------------------------------------------------------------------------------------------|-----------------------------------------------------------------------------------------------------------------------------------------------------------------------------------------------------------------------------------------------------|------------------------------------------------------------------------------------------------------------------------------------------------------------------------------------------------------------------------------------------------------|
| <b>141.0911</b> $\neg$ - (+0H)<br>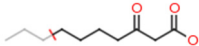<br><br>141.0552 (+35.9.mDa)<br>(S:1.0, B:1)<br>C <sub>7</sub> H <sub>9</sub> O <sub>3</sub> (-C <sub>3</sub> H <sub>8</sub> ) | <b>125.1014</b> $\neg$ - (+1H)<br><br><br>125.0603 (+41.1.mDa)<br>(S:1.5, B:2)<br>C <sub>7</sub> H <sub>9</sub> O <sub>2</sub> (-C <sub>3</sub> H <sub>8</sub> O) | <b>109.0276</b> $\neg$ - (-1H)<br><br><br>109.0290 (-1.4.mDa)<br>(S:1.5, B:2)<br>C <sub>6</sub> H <sub>5</sub> O <sub>2</sub> (-C <sub>4</sub> H <sub>12</sub> O) | <b>79.9580</b> $\neg$ - (+0H)<br><br><br>80.0262 (-68.2.mDa)<br>(S:3.5, B:3)<br>C <sub>5</sub> H <sub>4</sub> O (-C <sub>5</sub> H <sub>13</sub> O <sub>2</sub> ) |
|                                                                                                                                                                                                                                                   |                                                                                                                                                                                                                                                    |                                                                                                                                                                                                                                                     |                                                                                                                                                                                                                                                      |

## 24. 3-Hydroxycapric acid:

Input:

|                                                                                     |                  |                                                |
|-------------------------------------------------------------------------------------|------------------|------------------------------------------------|
| 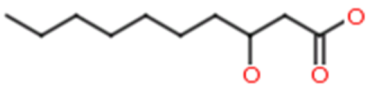 | <b>ID (job)</b>  | 43                                             |
|                                                                                     | <b>Mass (Da)</b> | 188.1412                                       |
|                                                                                     | <b>Formula</b>   | C <sub>10</sub> H <sub>20</sub> O <sub>3</sub> |
|                                                                                     | <b>DBE</b>       | 1                                              |

Experiment:

|                                 |                                                                                                             |
|---------------------------------|-------------------------------------------------------------------------------------------------------------|
| <b>Product ion(s) (Da)</b>      | 151.0831 145.0560 135.0472 124.0039<br>+/- 0.1 in positive mode, structure filter off                       |
| <b>DBE</b>                      | 0 to 50                                                                                                     |
| <b>Electron count</b>           | both                                                                                                        |
| <b>Maximum H deficit</b>        | 6                                                                                                           |
| <b>Fragment number of bonds</b> | 4                                                                                                           |
| <b>Scoring</b>                  | aromatic: 6, multiple: 4, ring: 2, phenyl: 8, other: 1<br>H-deficit: 0, hetero modifier: 0.5, max score: 16 |
| <b>Order:</b>                   | mass                                                                                                        |
| <b>Plot:</b>                    | show <input checked="" type="checkbox"/> hide <input checked="" type="checkbox"/>                           |

Results:



|                                                                                                                                                                                                                                      |                                                                                                                                                                                                                                                    |                                                                                                                                                                                                                                                      |
|--------------------------------------------------------------------------------------------------------------------------------------------------------------------------------------------------------------------------------------|----------------------------------------------------------------------------------------------------------------------------------------------------------------------------------------------------------------------------------------------------|------------------------------------------------------------------------------------------------------------------------------------------------------------------------------------------------------------------------------------------------------|
| <b>151.0831</b> $\rightarrow$ (-3H)<br>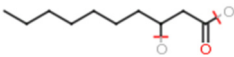<br>151.1123 (-29.2.mDa) (S:1.0, B:2)<br>C <sub>10</sub> H <sub>15</sub> O (-H <sub>6</sub> O <sub>2</sub> ) | <b>145.0560</b> $\rightarrow$ (+3H)<br><br>145.1229 (-66.9.mDa) (S:1.5, B:2)<br>C <sub>8</sub> H <sub>17</sub> O <sub>2</sub> (-C <sub>2</sub> H <sub>4</sub> O) | <b>124.0039</b> $\rightarrow$ (-1H)<br><br>124.0888 (-84.9.mDa) (S:2.0, B:3)<br>C <sub>8</sub> H <sub>12</sub> O (-C <sub>2</sub> H <sub>9</sub> O <sub>2</sub> ) |
|                                                                                                                                                                                                                                      |                                                                                                                                                                                                                                                    |                                                                                                                                                                                                                                                      |

## 25. Prostaglandin E2:

Input:

|                                                                                    |           |                                                |
|------------------------------------------------------------------------------------|-----------|------------------------------------------------|
| 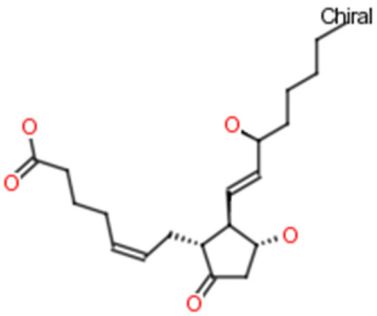 | ID (job)  | 62                                             |
|                                                                                    | Mass (Da) | 352.2250                                       |
|                                                                                    | Formula   | C <sub>20</sub> H <sub>32</sub> O <sub>5</sub> |
|                                                                                    | DBE       | 6                                              |

Experiment:

|                          |                                                                                                             |
|--------------------------|-------------------------------------------------------------------------------------------------------------|
| Product ion(s) (Da)      | 115.0025 162.0184 241.9754 351.2107<br>+/- 0.1 in negative mode, structure filter off                       |
| DBE                      | 0 to 50                                                                                                     |
| Electron count           | both                                                                                                        |
| Maximum H deficit        | 6                                                                                                           |
| Fragment number of bonds | 4                                                                                                           |
| Scoring                  | aromatic: 6, multiple: 4, ring: 2, phenyl: 8, other: 1<br>H-deficit: 0, hetero modifier: 0.5, max score: 16 |
| Order:                   | mass                                                                                                        |
| Plot:                    | show <input checked="" type="checkbox"/> hide <input type="checkbox"/>                                      |

Results:

|                                                                                                                                                                                                                        |                                                                                                                                                                                                                                                                    |                                                                                                                                                                                                                                                                     |
|------------------------------------------------------------------------------------------------------------------------------------------------------------------------------------------------------------------------|--------------------------------------------------------------------------------------------------------------------------------------------------------------------------------------------------------------------------------------------------------------------|---------------------------------------------------------------------------------------------------------------------------------------------------------------------------------------------------------------------------------------------------------------------|
| <b>351.2107</b> $\gamma$ - (+1H)<br>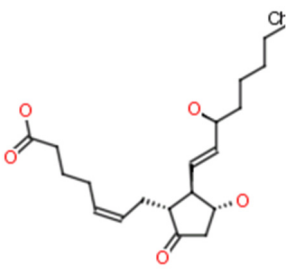<br>351.2171 (-6.4.mDa)<br>(S:2.0, B:0)<br>C <sub>20</sub> H <sub>31</sub> O <sub>5</sub> (-none) | <b>162.0184</b> $\gamma$ - (+0H)<br><br>162.0681 (-49.7.mDa)<br>(S:2.0, B:2)<br>C <sub>10</sub> H <sub>10</sub> O <sub>2</sub> (-C <sub>10</sub> H <sub>21</sub> O <sub>3</sub> ) | <b>115.0025</b> $\gamma$ - (+5H)<br><br>115.0759 (-73.4.mDa)<br>(S:2.0, B:2)<br>C <sub>6</sub> H <sub>11</sub> O <sub>2</sub> (-C <sub>14</sub> H <sub>20</sub> O <sub>3</sub> ) |
|                                                                                                                                                                                                                        |                                                                                                                                                                                                                                                                    |                                                                                                                                                                                                                                                                     |

## 26. (+)-trans-Carveol:

Input:

|                                                                                     |        |           |                                   |
|-------------------------------------------------------------------------------------|--------|-----------|-----------------------------------|
| 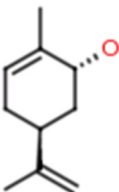 | Chiral | ID (job)  | 39                                |
|                                                                                     |        | Mass (Da) | 152.1201                          |
|                                                                                     |        | Formula   | C <sub>10</sub> H <sub>16</sub> O |
|                                                                                     |        | DBE       | 3                                 |

Experiment:

|                          |                                                                                                             |
|--------------------------|-------------------------------------------------------------------------------------------------------------|
| Product ion(s) (Da)      | 136.0390 122.0321 94.0446<br>+/- 0.1 in positive mode, structure filter off                                 |
| DBE                      | 0 to 50                                                                                                     |
| Electron count           | both                                                                                                        |
| Maximum H deficit        | 6                                                                                                           |
| Fragment number of bonds | 4                                                                                                           |
| Scoring                  | aromatic: 6, multiple: 4, ring: 2, phenyl: 8, other: 1<br>H-deficit: 0, hetero modifier: 0.5, max score: 16 |
| Order:                   | mass                                                                                                        |
| Plot:                    | show <input checked="" type="checkbox"/> hide <input type="checkbox"/>                                      |

Results:

|                                                                                                                                                                                                                |                                                                                                                                                                                                                              |                                                                                                                                                                                                                                            |
|----------------------------------------------------------------------------------------------------------------------------------------------------------------------------------------------------------------|------------------------------------------------------------------------------------------------------------------------------------------------------------------------------------------------------------------------------|--------------------------------------------------------------------------------------------------------------------------------------------------------------------------------------------------------------------------------------------|
| <b>136.0390</b> $\neg + (+1H)$<br>Chiral<br>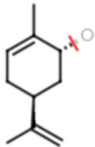<br>136.1252 (-86.2.mDa) (S:0.5,<br>B:1)<br>C <sub>10</sub> H <sub>16</sub> (-HO) | <b>122.0321</b> $\neg + (+2H)$<br>Chiral<br><br>122.1096 (-77.4.mDa) (S:1.5,<br>B:2)<br>C <sub>9</sub> H <sub>14</sub> (-CH <sub>3</sub> O) | <b>94.0446</b> $\neg + (+0H)$<br>Chiral<br><br>94.0783 (-33.6.mDa) (S:1.5,<br>B:2)<br>C <sub>7</sub> H <sub>10</sub> (-C <sub>3</sub> H <sub>7</sub> O) |
|                                                                                                                                                                                                                |                                                                                                                                                                                                                              |                                                                                                                                                                                                                                            |

## 27. trans-Dec-2-enoic acid:

Input:

|                                                                                     |           |                                                |
|-------------------------------------------------------------------------------------|-----------|------------------------------------------------|
| 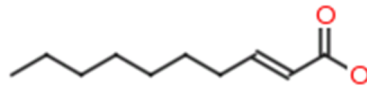 | ID (job)  | 35                                             |
|                                                                                     | Mass (Da) | 170.1307                                       |
|                                                                                     | Formula   | C <sub>10</sub> H <sub>18</sub> O <sub>2</sub> |
|                                                                                     | DBE       | 2                                              |

Experiment:

|                          |                                                                                                             |
|--------------------------|-------------------------------------------------------------------------------------------------------------|
| Product ion(s) (Da)      | 140.0370 127.0250 97.0009 83.0496<br>+/- 0.1 in positive mode, structure filter off                         |
| DBE                      | 0 to 50                                                                                                     |
| Electron count           | both                                                                                                        |
| Maximum H deficit        | 6                                                                                                           |
| Fragment number of bonds | 4                                                                                                           |
| Scoring                  | aromatic: 6, multiple: 4, ring: 2, phenyl: 8, other: 1<br>H-deficit: 0, hetero modifier: 0.5, max score: 16 |
| Order:                   | mass                                                                                                        |
| Plot:                    | show <input checked="" type="checkbox"/> hide <input type="checkbox"/>                                      |

Results:

|                                                                                                                                                                                                                                                |                                                                                                                                                                                                                                                |                                                                                                                                                                                                                                               |                                                                                                                                                                                                                                                |
|------------------------------------------------------------------------------------------------------------------------------------------------------------------------------------------------------------------------------------------------|------------------------------------------------------------------------------------------------------------------------------------------------------------------------------------------------------------------------------------------------|-----------------------------------------------------------------------------------------------------------------------------------------------------------------------------------------------------------------------------------------------|------------------------------------------------------------------------------------------------------------------------------------------------------------------------------------------------------------------------------------------------|
| <b>140.0370</b> $\neg+$ (-1H)<br>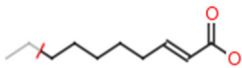<br><br>140.0837 (-46.7.mDa) (S:1.0, B:1)<br>C <sub>8</sub> H <sub>12</sub> O <sub>2</sub> (-C <sub>2</sub> H <sub>7</sub> ) | <b>127.0250</b> $\neg+$ (+0H)<br><br><br>127.0759 (-50.9.mDa) (S:1.0, B:1)<br>C <sub>7</sub> H <sub>11</sub> O <sub>2</sub> (-C <sub>3</sub> H <sub>8</sub> ) | <b>97.0009</b> $\neg+$ (-2H)<br><br><br>97.0290 (-28.1.mDa) (S:1.0, B:1)<br>C <sub>5</sub> H <sub>8</sub> O <sub>2</sub> (-C <sub>5</sub> H <sub>14</sub> ) | <b>83.0496</b> $\neg+$ (-2H)<br><br><br>83.0133 (+36.3.mDa) (S:1.0, B:1)<br>C <sub>4</sub> H <sub>8</sub> O <sub>2</sub> (-C <sub>6</sub> H <sub>16</sub> ) |
|                                                                                                                                                                                                                                                |                                                                                                                                                                                                                                                |                                                                                                                                                                                                                                               |                                                                                                                                                                                                                                                |

## 28. Acetylcysteine:

Input:

|                                                                                     |        |           |                                                 |
|-------------------------------------------------------------------------------------|--------|-----------|-------------------------------------------------|
| 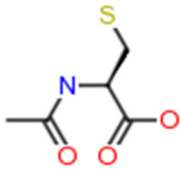 | Chiral | ID (job)  | 14                                              |
|                                                                                     |        | Mass (Da) | 163.0303                                        |
|                                                                                     |        | Formula   | C <sub>5</sub> H <sub>9</sub> NO <sub>3</sub> S |
|                                                                                     |        | DBE       | 2                                               |

Experiment:

|                          |                                                                                                             |
|--------------------------|-------------------------------------------------------------------------------------------------------------|
| Product ion(s) (Da)      | 147.0233 133.0462 102.0408<br>+/- 0.1 in positive mode, structure filter off                                |
| DBE                      | 0 to 50                                                                                                     |
| Electron count           | both                                                                                                        |
| Maximum H deficit        | 6                                                                                                           |
| Fragment number of bonds | 4                                                                                                           |
| Scoring                  | aromatic: 6, multiple: 4, ring: 2, phenyl: 8, other: 1<br>H-deficit: 0, hetero modifier: 0.5, max score: 16 |
| Order:                   | mass                                                                                                        |
| Plot:                    | show <input checked="" type="checkbox"/> hide <input type="checkbox"/>                                      |

Results:

|                                                                                                                                                                                                                        |                                                                                                                                                                                                                                     |                                                                                                                                                                                                                                                              |
|------------------------------------------------------------------------------------------------------------------------------------------------------------------------------------------------------------------------|-------------------------------------------------------------------------------------------------------------------------------------------------------------------------------------------------------------------------------------|--------------------------------------------------------------------------------------------------------------------------------------------------------------------------------------------------------------------------------------------------------------|
| <p><b>147.0233</b> <math>\neg + (+1H)</math><br/>Ch</p> 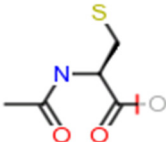 <p>147.0354 (-12.1.mDa)<br/>(S:0.5, B:1)<br/><chem>C5H9NO2S</chem> (-HO)</p> | <p><b>133.0462</b> <math>\neg + (+2H)</math><br/>Ch</p>  <p>133.0198 (+26.4.mDa)<br/>(S:1.5, B:2)<br/><chem>C4H7NO2S</chem> (-CH<sub>3</sub>O)</p> | <p><b>102.0408</b> <math>\neg + (-1H)</math><br/>Ch</p>  <p>102.0014 (+39.4.mDa)<br/>(S:1.0, B:2)<br/><chem>C3H4NOS</chem> (-C<sub>2</sub>H<sub>6</sub>O<sub>2</sub>)</p> |
|------------------------------------------------------------------------------------------------------------------------------------------------------------------------------------------------------------------------|-------------------------------------------------------------------------------------------------------------------------------------------------------------------------------------------------------------------------------------|--------------------------------------------------------------------------------------------------------------------------------------------------------------------------------------------------------------------------------------------------------------|
